# Supplementary material for: High-rate CO2sequestration using a novel venturi integrated photobioreactor and subsequent valorization to microalgal lipids
Source: Royal Society of Chemistry journal article supplement (doi:10.1039/d0gc02552f), 2020-01-01
Supplement: d0gc02552f1.pdf [file d0gc02552f1.pdf]

## Supplementary Data

Supplementary Figure 1

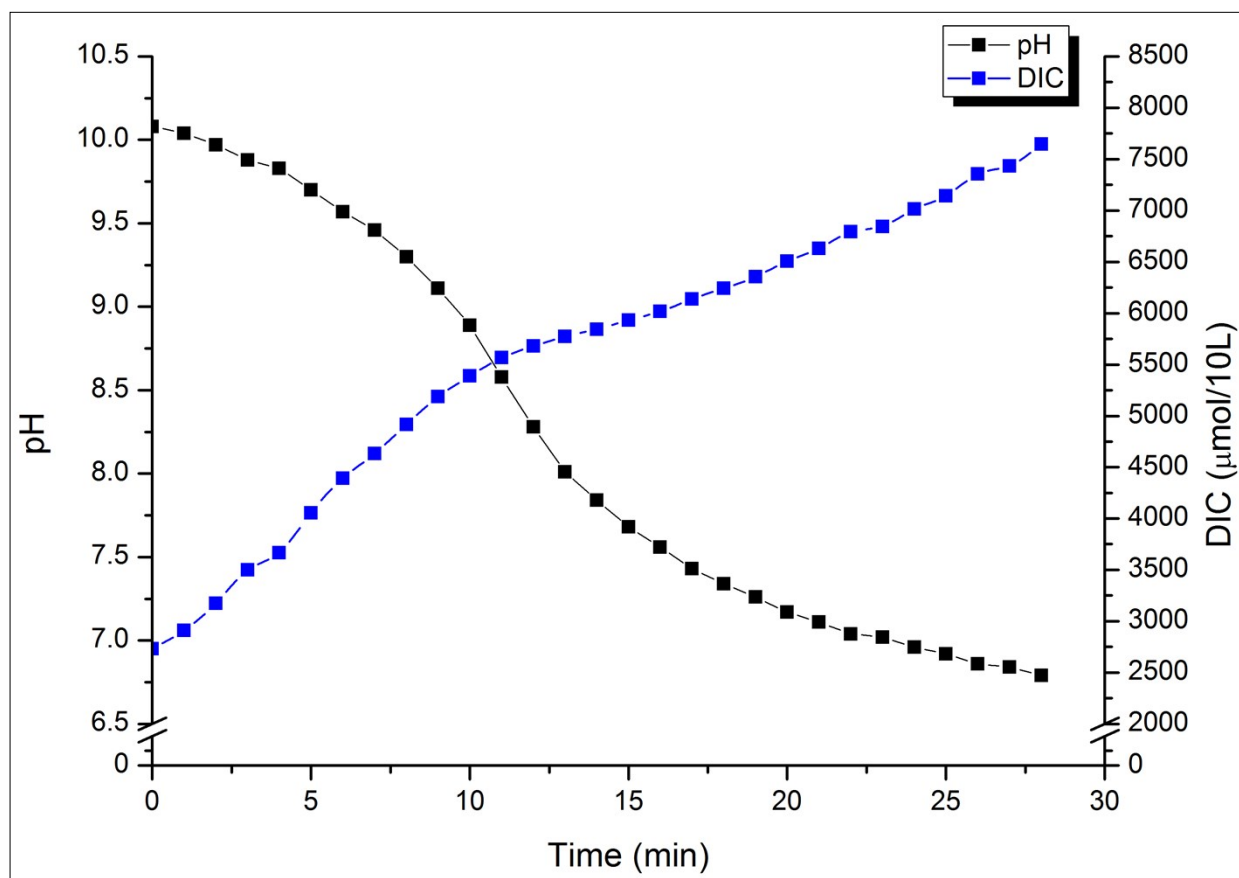

Figure S1. Estimation of *DIC* as a function of change in pH at constant TA. Plot is for  $Q_G = 0.1 \text{ L}\cdot\text{min}^{-1}$ ,  $T_c = 28 \text{ min}$ .

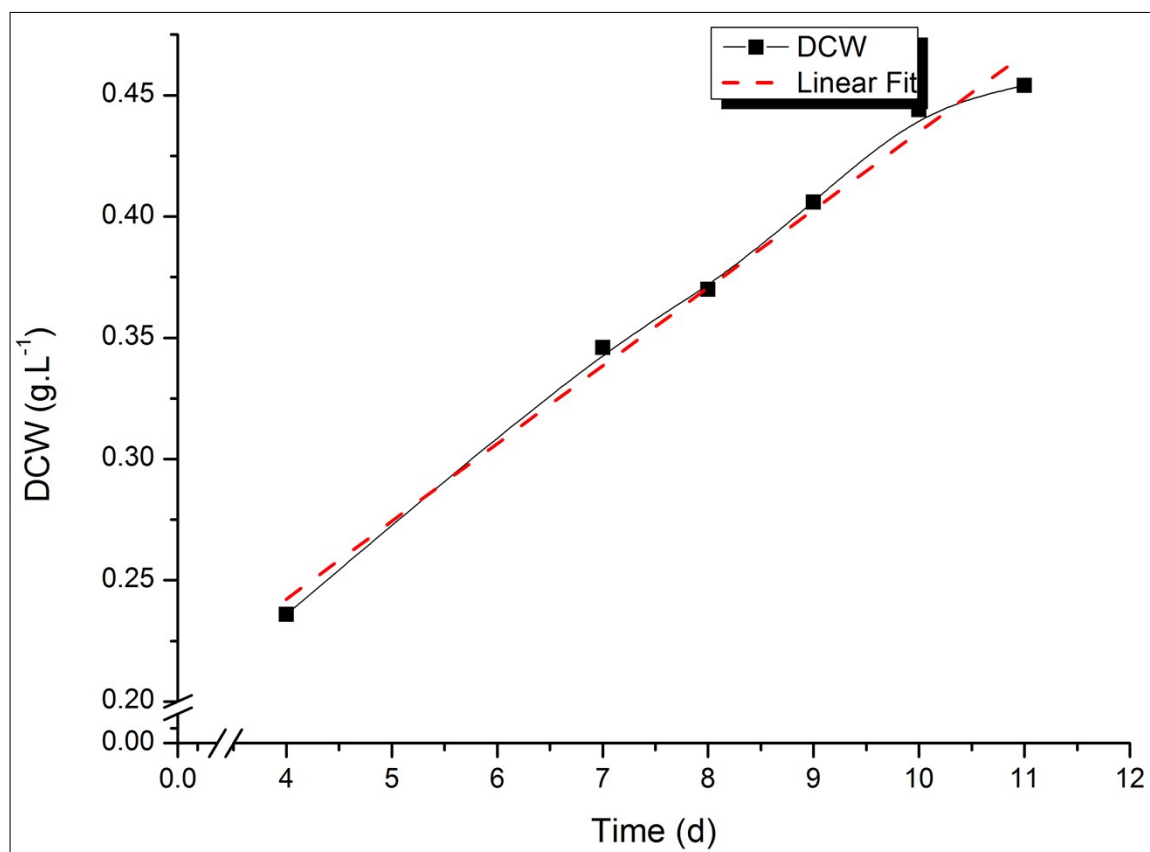

Figure S2. Linear fit of DCW and time of growth. Biomass productivity ' $P_{\max}$ ' is obtained as slope of linear fit, where Pearson's  $r = 0.99$ , Adj.  $R^2 = 0.98$

Supplementary Figure 3

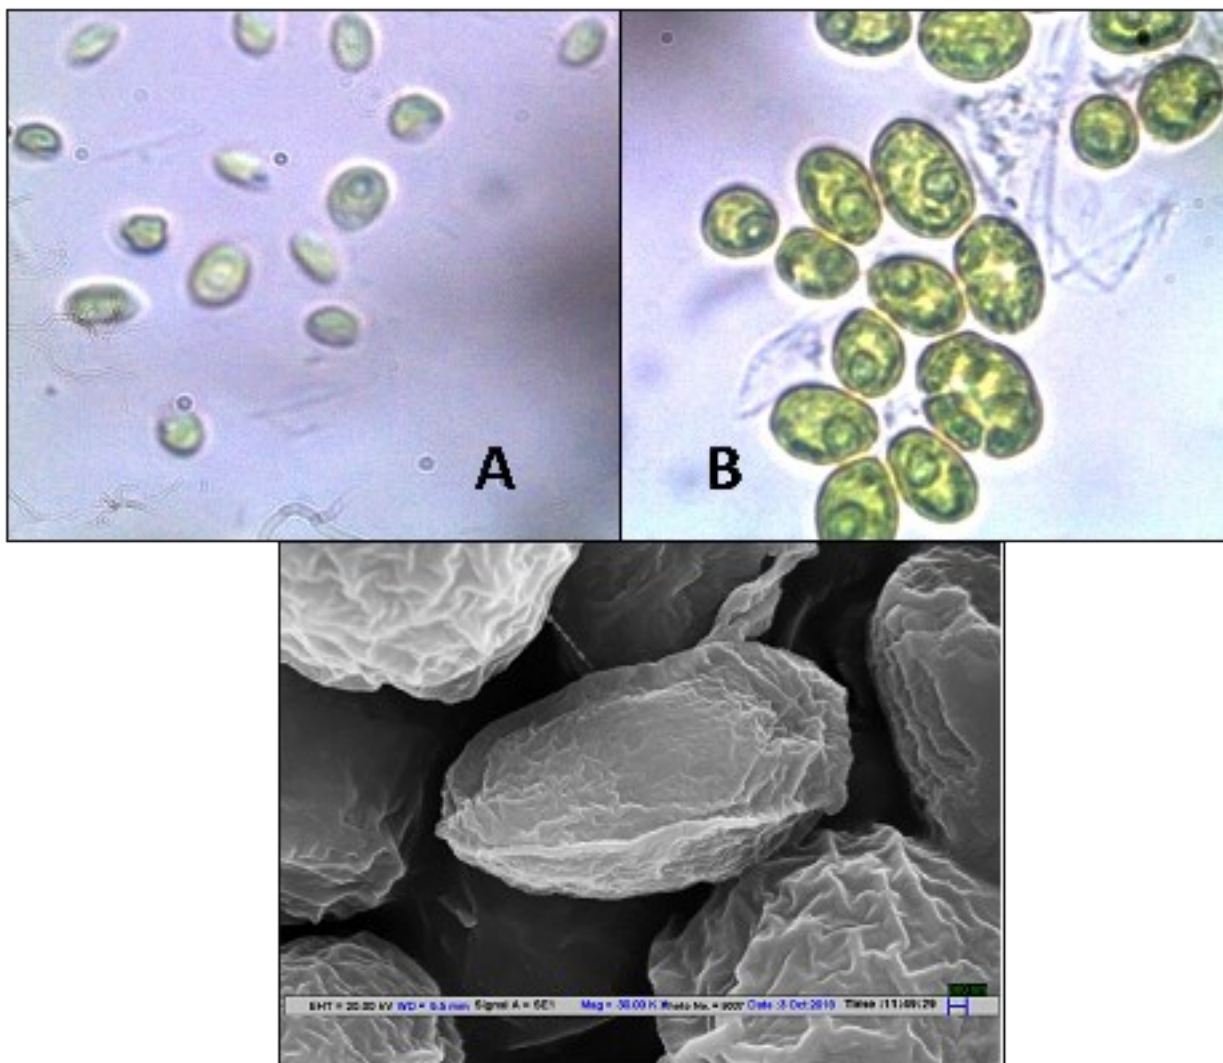

Figure S3. Microscopic image of PA4. Brightfield Image (TOP), A: Day 1, B: Day 11, Magnification =100x . SEM Image (BELOW), EHT =20kV, Magnification = 30,000x
